# Supplementary figures and images for: Classifying dynamic contact line modes in drying drops
Source: Royal Society of Chemistry journal article supplement (doi:10.1039/c4sm02642j), 2015-01-01

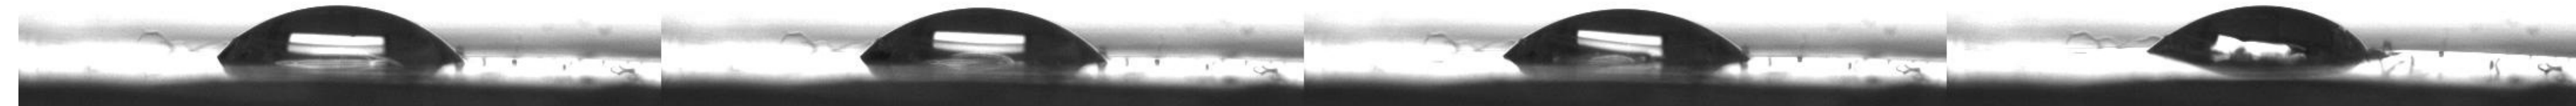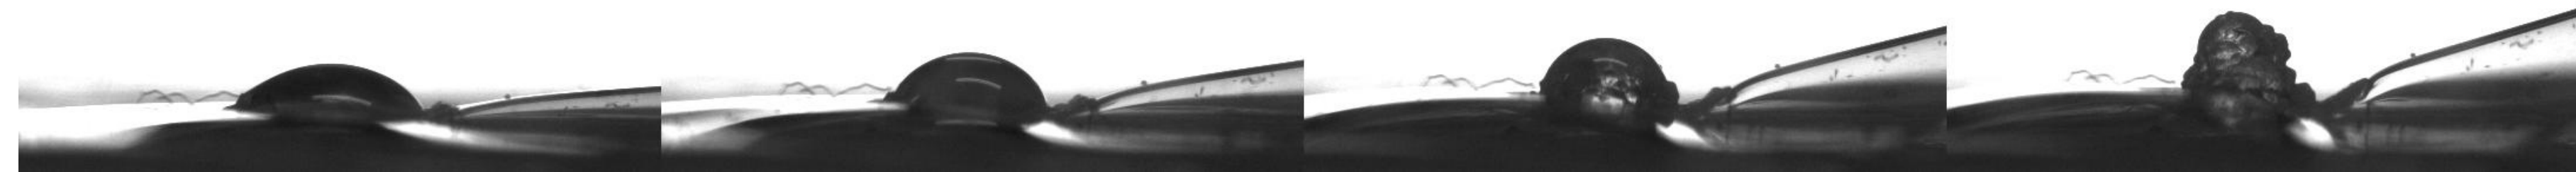

Supplement: c4sm02642j3.pdf [file c4sm02642j3.pdf]

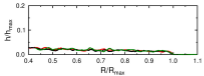

Supplement: c4sm02642j4.pdf [file c4sm02642j4.pdf]
